# Supplementary material
Source: Springer Nature journal article supplement (https://www.springermedizin.de/resource/supplementary/12891_2008_588_MOESM2_ESM.pdf/9506166)

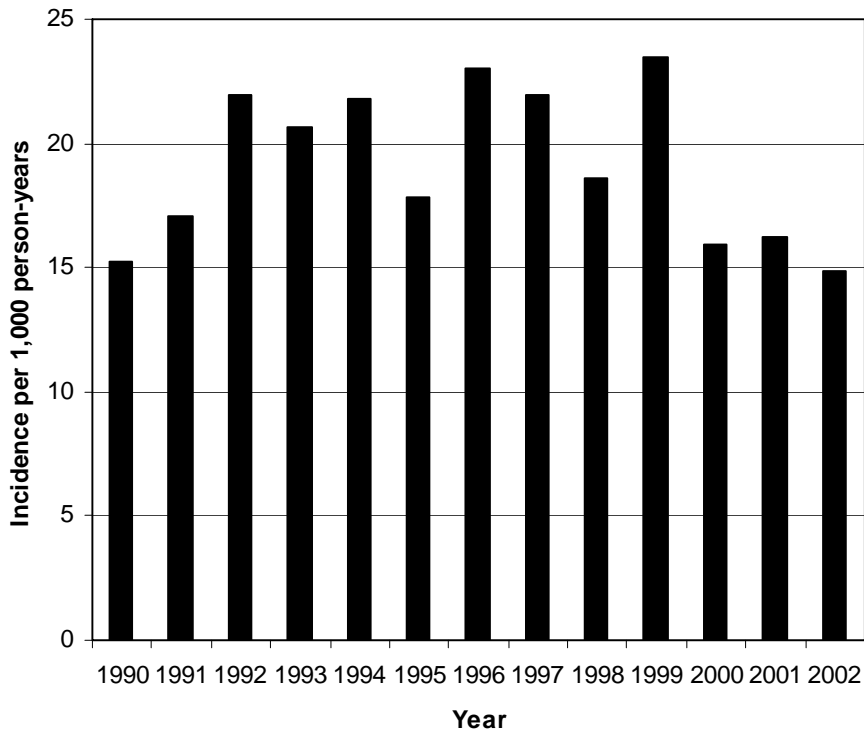

■ Unspecified low back pain

Supplement: MOESM2 [file 9506166]
